# Supplementary material for: Survival Prediction Based on Compound Covariate under Cox Proportional Hazard Models
Source: PubMed Central journal article supplement (PMC3480451; doi:10.1371/journal.pone.0047627), 2012-10-24
Supplement: pone.0047627.s002.pdf [file pone.0047627.s002.pdf]

## Supporting Information S2:

Comparison of the four prediction methods for the lung cancer data with  $p = 124$  genes.

**Table S2. Performance of the four methods based on the non-small-cell lung cancer data of Chen et al. (2007) with  $p = 124$  genes**

|                                 | Compound<br>covariate | Compound<br>shrinkage | Ridge<br>regression | Lasso |
|---------------------------------|-----------------------|-----------------------|---------------------|-------|
| LR-test ( $\log_{10}$ P-value)  | -1.07                 | -0.52                 | -0.04               | -0.15 |
| Cox-test ( $\log_{10}$ P-value) | -0.16                 | -0.94                 | -0.10               | -0.13 |
| $c$ -index                      | 0.586                 | 0.600                 | 0.537               | 0.540 |
| Deviance                        | 1781.2                | 68.3                  | 12.7                | 13.9  |
| $\hat{a}, \hat{\lambda}$        | /                     | 0.7                   | 12.39               | 2.91  |

NOTE: Smaller values of the LR-test, Cox-test and Deviance, and larger values of the  $c$ -index correspond to accurate prediction performance.

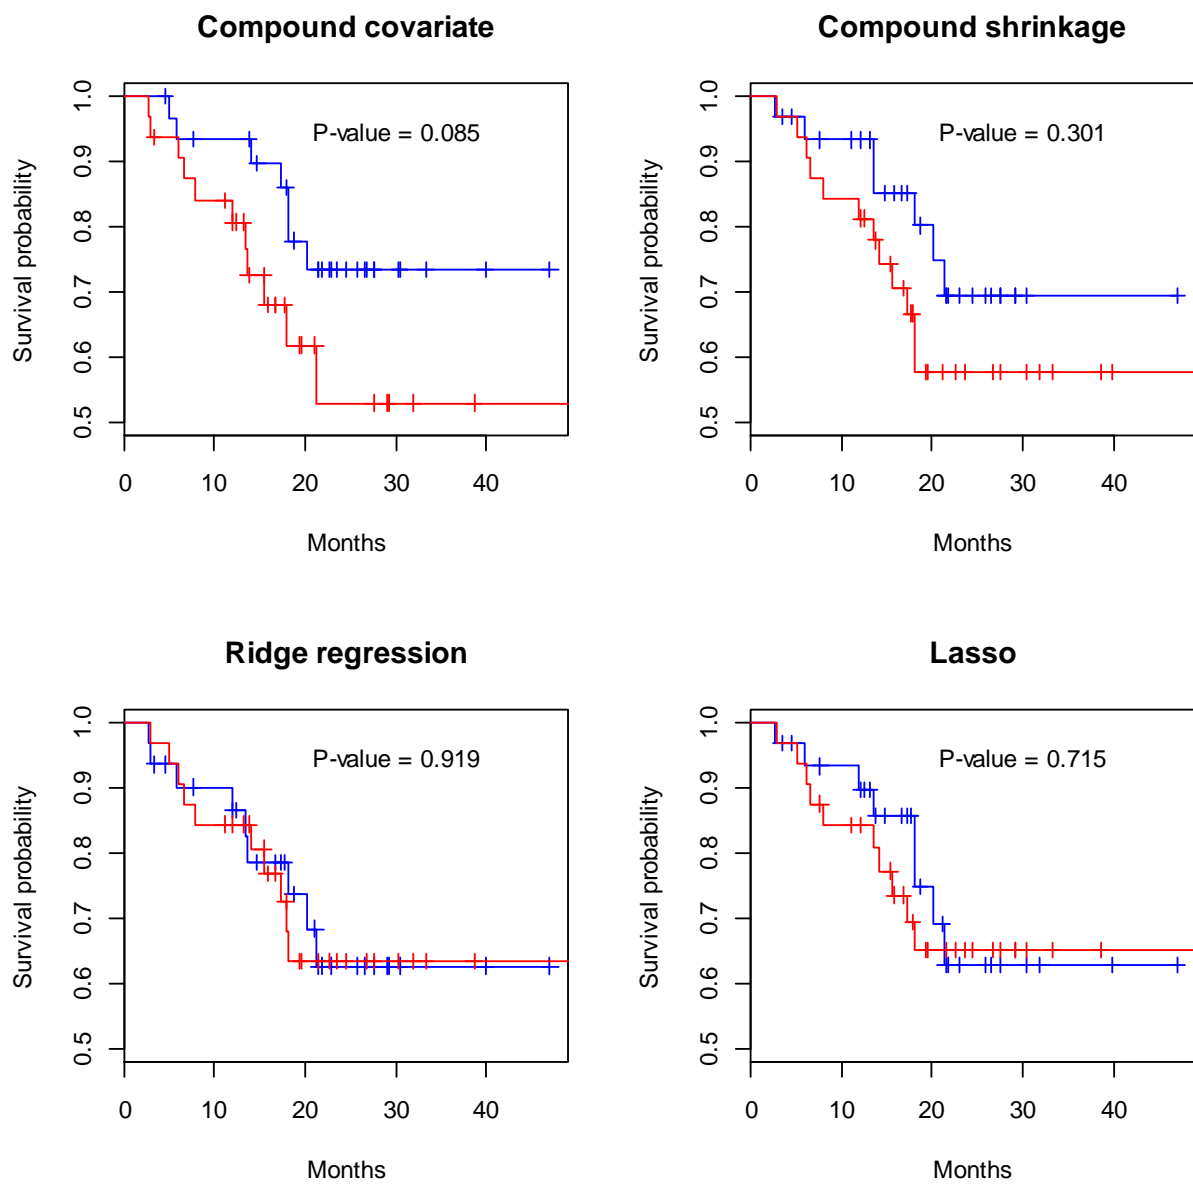

**Figure S2-a.** Kaplan-Meier curves for the 62 patients in the lung cancer data of Chen et al. (2007) with  $p = 124$  genes. Good (blue line) and poor (red line) groups are determined by the median of the PI's in the test dataset.

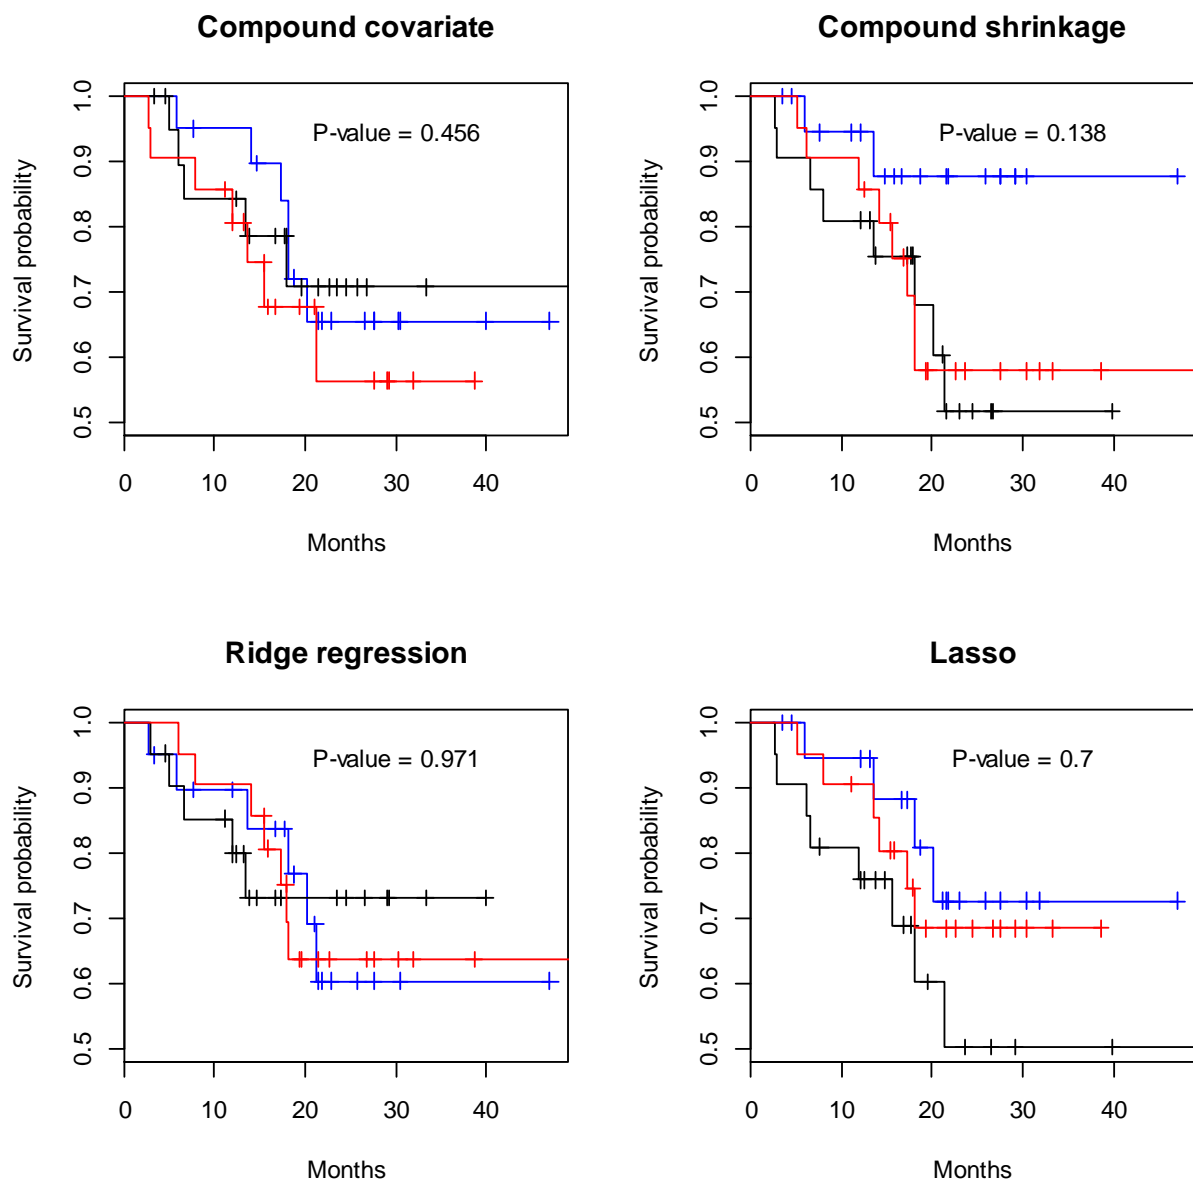

**Figure S2-b.** Kaplan-Meier curves for the 62 patients in the lung cancer data of Chen et al. (2007) with  $p = 124$  genes. Good (blue line), medium (black line), and poor (red line) groups are determined by the tertile of the PI's in the test dataset.
